# Supplementary material for: Comparative effectiveness of nonpharmacological interventions for the nutritional status of maintenance hemodialysis patients: a systematic review and network meta-analysis
Source: PeerJ. 2025 Feb 24;13:e19053. doi: 10.7717/peerj.19053 (PMC11867038; doi:10.7717/peerj.19053)
Supplement: Supplemental Information 2 [file peerj-13-19053-s002.xlsx]

## Sheet: ALB
study	treatment	mean	std.dev	sampleSize
Wei 2020	A	44.05	3.52	42
Wei 2020	N	38.26	3.18	42
Zhou 2016	A	45.5	3	30
Zhou 2016	N	38.3	3.6	30
Li juan 2008	A	45.36	6.63	23
Li juan 2008	N	35.36	4.23	25
Lu 2022	A	39	4.4	30
Lu 2022	N	37.3	4	28
Abreu 2017	B	43	3	25
Abreu 2017	N	42	2	19
Wang xiaojing2019	C	38.62	3.38	20
Wang xiaojing2019	N	38.27	3.56	20
Afshar 2010	B	40	3	7
Afshar 2010	C	40	4	7
Afshar 2010	N	40	3	7
Dai 2021	B	39.82	2.29	20
Dai 2021	N	38.61	2.37	30
Yan 2022	B	44.57	6.53	47
Yan 2022	N	41.08	6.14	47
Cai 2022	B	39.58	5.89	44
Cai 2022	N	33.75	7.89	44
Tayebi 2018	B	39.3	4.5	17
Tayebi 2018	N	36.2	3.2	14
Liao 2016	C	41.6	3	20
Liao 2016	N	40.1	4.2	20
Leng 2012	C	40.46	6.9	39
Leng 2012	N	40.92	4.59	42
Wang chenglong 2021	C	34.96	3.42	26
Wang chenglong 2021	N	32.16	4.64	28
Wilund 2010	C	38	0.6	8
Wilund 2010	N	39	1.5	9
Su 2022	C	39.69	4.03	45
Su 2022	N	35.06	3.74	45
Wang 2023	D	37.35	3.69	43
Wang 2023	N	36.07	3.53	41
Chen 2019	D	39.6	5.6	54
Chen 2019	N	35.6	5.5	54
Jeong 2019	D	40.1	3.1	45
Jeong 2019	H	39.3	5.1	49
Jeong 2019	N	40	3.1	44
Limwannata 2021	D	38	6	30
Limwannata 2021	N	37	4	24
Bolasco 2011	D	35.8	2.3	15
Bolasco 2011	N	30.9	3.1	14
Tan 2015	D	37.19	1.54	31
Tan 2015	N	35.18	5.11	31
Yang 2021	D	40	3	120
Yang 2021	N	40	3	120
Wen 2022	D	37.19	3.72	49
Wen 2022	N	36.32	3.34	43
Sezer 2014	D	37	2	29
Sezer 2014	N	35	3	29
Yu 2018	D	35.06	5.04	31
Yu 2018	N	29.34	4.16	31
Ai 2020	E	41.86	5.61	40
Ai 2020	N	36.46	5.08	40
Sun 2022	E	45.56	4.54	60
Sun 2022	N	40.63	5.15	59
Zhou 2020	E	42.16	7.63	37
Zhou 2020	N	39.46	4.27	37
Xu 2022	E	44.28	5.35	25
Xu 2022	N	40.99	5.82	25
Wang yanli 2019	E	41.87	5.62	37
Wang yanli 2019	N	31.67	5.09	37
Wang liuwen 2018	E	40.82	5.62	30
Wang liuwen 2018	N	38.42	5.04	30
Deng 2011	E	45.3	5.82	48
Deng 2011	N	30.42	6.2	48
Lifang 2020	E	46.32	5.02	20
Lifang 2020	N	42.36	2.02	20
Xu yan 2016	E	41.85	5.63	46
Xu yan 2016	N	36.43	5.02	46
Kozlowska 2023	E	47.8	5.1	35
Kozlowska 2023	N	41.1	4.8	35
Feng 2020	F	42.11	3.21	68
Feng 2020	N	37.11	2.56	68
Zeng 2020	F	38.96	1.8	50
Zeng 2020	N	34.7	2.07	50
Shi 2021	F	41.58	8.45	79
Shi 2021	N	38.86	11.39	78
Yao 2020	F	42.32	1.34	48
Yao 2020	N	39.78	3.12	46
Tabibi 2023	G	40	3	35
Tabibi 2023	N	35	2	33
Firh 2017	G	40	2.6	21
Firh 2017	N	40.4	3.7	20
Zhu 2020	G	37.2	3.54	53
Zhu 2020	N	36.92	4.01	53
Martin-Alemay 2020	H	34	5.5	12
Martin-Alemay 2020	I	38	4.4	9
Martin-Alemay 2020	D	39	4	13
Martin-Alemay 2016	I	37	3.3	17
Martin-Alemay 2016	D	37	3.5	19
Hristea 2016	H	39.33	2.51	7
Hristea 2016	D	39.12	3.67	9
Martin-Alemay 2022	J	55	15	10
Martin-Alemay 2022	D	52	22	14

## Sheet: BMI
study	treatment	mean	std.dev	sampleSize
Lu 2022	A	21.91	1.24	30
Lu 2022	N	22.07	1.24	28
Abreu 2017	B	23.8	4.5	25
Abreu 2017	N	24.1	4.9	19
Dai 2021	B	24.08	4.09	20
Dai 2021	N	25.67	4.71	30
Cai 2022	B	23.67	2.12	44
Cai 2022	N	20.67	4.69	44
Tayebi 2018	B	25	3	17
Tayebi 2018	N	24.3	3.2	14
Liao 2016	C	22.96	3.36	20
Liao 2016	N	23.91	5.27	20
leng 2012	C	21.98	2.84	39
leng 2012	N	21.75	2.23	42
Wilund 2010	C	30.3	2.5	8
Wilund 2010	N	28.3	1.8	9
Wang 2023	D	19.97	1.8	43
Wang 2023	N	20.92	2.41	41
Chen 2019	D	20.8	2.5	54
Chen 2019	N	20.1	2.4	54
Jeong 2019	H	33.9	10.9	49
Jeong 2019	D	31.5	7.4	45
Jeong 2019	N	32.3	8.5	44
Limwannata 2021	D	22.9	4.6	30
Limwannata 2021	N	23.4	5.2	24
Bolasco 2011	D	28.5	5.5	15
Bolasco 2011	N	25.4	5.8	14
Tan 2015	D	22.06	0.9	31
Tan 2015	N	21.41	2.73	31
Yang 2021	D	20.1	2.5	120
Yang 2021	N	20.9	3	120
Wen 2022	D	20.81	2.46	49
Wen 2022	N	19.51	2.6	43
Sezer 2014	D	22.9	3.7	29
Sezer 2014	N	23	4.5	29
Yu 2018	D	21.26	2.24	31
Yu 2018	N	18.42	2.13	31
Ai 2020	E	22.74	3.73	40
Ai 2020	N	20.3	3.23	40
Wang yanli 2019	E	22.75	3.74	37
Wang yanli 2019	N	20.31	3.24	37
Wang liuweng 2018	E	22.24	6.21	30
Wang liuweng 2018	N	20.34	3.91	30
Li fang 2020	E	23.65	1.47	20
Li fang 2020	N	21.23	1.1	20
Xu yan 2016	E	22.69	3.76	46
Xu yan 2016	N	20.3	3.21	46
Kozlowska 2023	E	25.5	4.2	35
Kozlowska 2023	N	27.1	4.8	35
Vijaya 2019	F	21.9	4.08	139
Vijaya 2019	N	20.43	3.85	138
Martin-Alemay 2020	H	21	2.6	12
Martin-Alemay 2020	I	22.1	1	9
Martin-Alemay 2020	D	19.8	1.7	13
Dong 2011	I	26.8	4.3	10
Dong 2011	D	29.3	6.8	12
Hristea 2016	H	20.89	1.19	7
Hristea 2016	D	20.93	2.57	9

## Sheet: HB
study	treatment	mean	std.dev	sampleSize
wei 2020	A	109.52	20.48	42
wei 2020	N	90.15	19.89	42
zhou 2016	A	107.8	23	30
zhou 2016	N	90.8	20.3	30
li 2008	A	105.32	15.31	23
li 2008	N	100.21	14.23	25
Lu 2022	A	101.92	7.58	30
Lu 2022	N	100.51	8.04	28
Abreu 2017	B	105	29	25
Abreu 2017	N	106	23	19
Wang xiaojing 2019	C	112.3	18.89	20
Wang xiaojing 2019	N	104.44	14.26	20
Afshar 2010	B	103	2	7
Afshar 2010	C	101	5	7
Afshar 2010	N	102	3	7
Dai 2021	B	115.85	10.3	20
Dai 2021	N	117.5	8.09	30
Yan 2022	B	122.45	13.08	47
Yan 2022	N	115.39	13.52	47
Cai 2022	B	110.71	7.11	44
Cai 2022	N	105.26	7.87	44
Leng 2012	C	113.51	15.95	39
Leng 2012	N	107.86	14.31	42
Wang chenglong 2021	C	118.77	14.9	26
Wang chenglong 2021	N	109.32	18.14	28
Su 2022	C	105.91	5.83	45
Su 2022	N	98.36	4.87	45
Wang yu 2023	D	117.88	18.29	43
Wang yu 2023	N	98	21.24	41
Chen 2019	D	104.5	10.8	54
Chen 2019	N	99.7	12.6	54
Bolasco 2011	D	117	8	15
Bolasco 2011	N	106	6	14
Tan 2015	D	102.88	11.07	31
Tan 2015	N	102.72	10.44	31
Yang 2021	D	113	16	120
Yang 2021	N	112	17	120
Wen 2022	D	105.14	20.7	49
Wen 2022	N	110.47	17.69	43
Sezer 2014	D	113	12	29
Sezer 2014	N	107	15	29
Ai 2020	E	103.67	20.62	40
Ai 2020	N	92.73	17.53	40
Sun 2022	E	111.25	12.98	60
Sun 2022	N	103.4	14.97	59
Zhou 2020	E	104.27	14.86	37
Zhou 2020	N	94.26	11.87	37
Xu 2022	E	117.25	20.14	25
Xu 2022	N	106.43	17.75	25
Wang yanli 2019	E	104.68	20.63	37
Wang yanli 2019	N	92.74	17.54	37
Wang liuwneg 2018	E	104.64	20.52	30
Wang liuwneg 2018	N	94.51	17.64	30
Deng 2011	E	98	15.82	48
Deng 2011	N	86	17.93	48
Xu yan 2016	E	104.65	20.56	46
Xu yan 2016	N	92.71	17.51	46
Kozlowska 2023	E	108.2	13.5	35
Kozlowska 2023	N	108.4	13.4	35
Feng lei 2020	F	106.22	2.74	68
Feng lei 2020	N	92.41	3.52	68
Zeng tao 2020	F	96.34	4.87	50
Zeng tao 2020	N	86.34	5.28	50
Shi 2021	F	112.45	23.29	79
Shi 2021	N	103.03	18.39	78
Yao 2020	F	115.32	8.75	48
Yao 2020	N	106.24	10.36	46
Fakhrpour 2020	G	121.4	15	24
Fakhrpour 2020	N	113.3	16.4	21
Tabibi 2023	G	117	14	35
Tabibi 2023	N	99	12	33
Fang 2023	G	99.45	11.72	29
Fang 2023	N	100.67	20.08	30
Firh 2017	G	104	17	21
Firh 2017	N	100	16	20
Zhu 2020	G	99.77	6.29	53
Zhu 2020	N	96.45	5.23	53
Martin-Alemay 2020	H	98	23	12
Martin-Alemay 2020	I	117	17	9
Martin-Alemay 2020	D	106	18	13
Hristea 2016	H	10.92	0.69	7
Hristea 2016	D	11.21	0.66	9
Dong 2011	I	114	19	10
Dong 2011	D	122	18	12
